# Supplementary material
Source: Copernicus journal article supplement (doi:10.5194/acp-26-4885-2026)
Supplement: Supplementary file 1 [file acp-26-4885-2026-supplement.pdf]

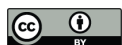

*Supplement of*

## **Quiet New Particle Formation is a significant aerosol source in the Amazon boundary layer**

**Bruno B. Meller et al.**

*Correspondence to:* Paulo Artaxo (artaxo@if.usp.br)

The copyright of individual parts of the supplement might differ from the article licence.

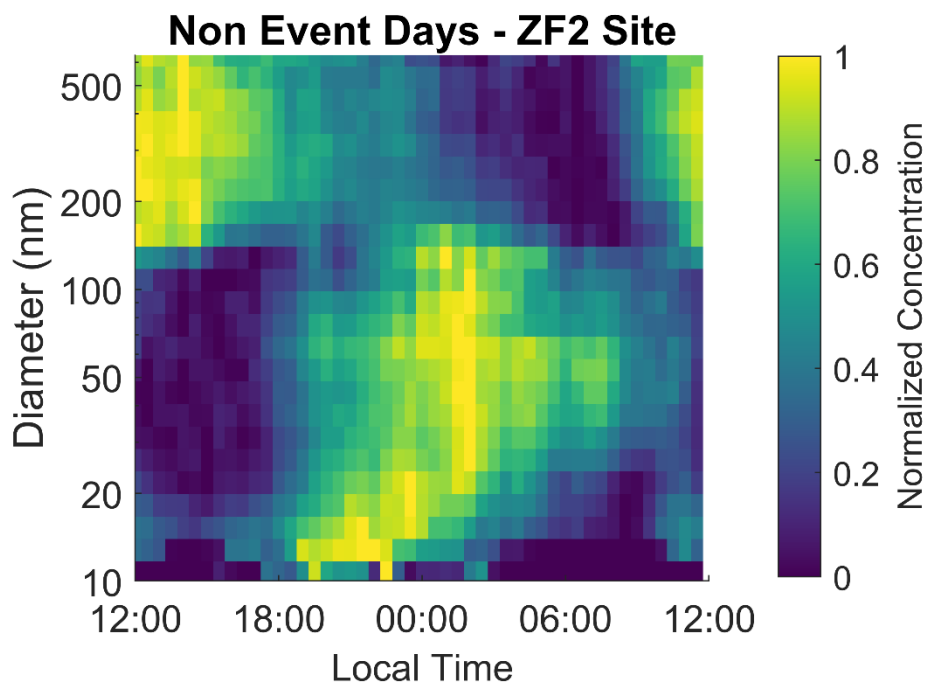

5

**Figure S1. Median diurnal cycle of the normalized particle number size distribution (PNSD) during non-event days at the ZF2 site, Central Amazon, for wet seasons from 2008 to 2012. The observed sequential growth pattern of sub-50 nm particles closely resembles that seen at the ATTO site, supporting the conclusion that Quiet New Particle Formation is a regionally consistent process across the Central Amazon.**

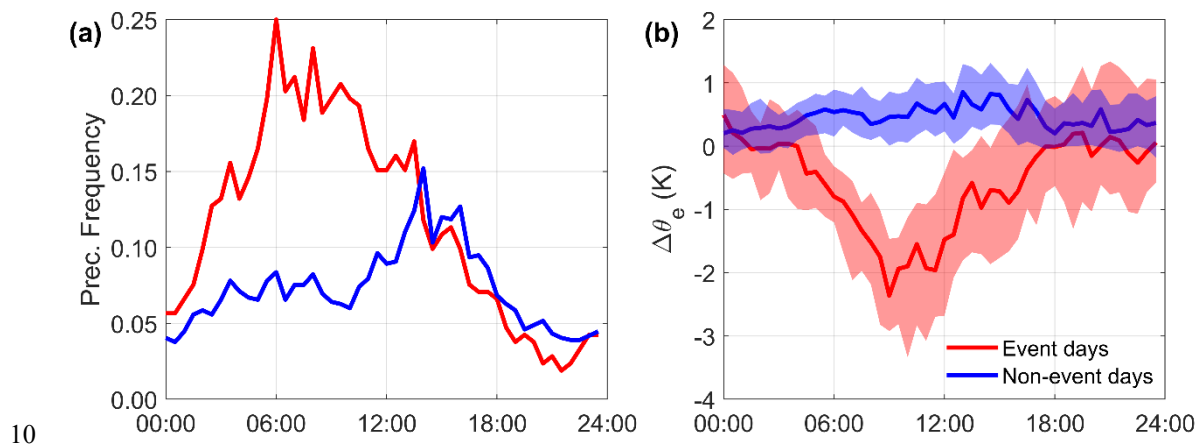

**Figure S2. Median diurnal cycle of the normalized particle number size distribution (PNSD) during non-event days at the ZF2 site, Central Amazon, for wet seasons from 2008 to 2012. The observed sequential growth pattern of sub-50 nm particles closely resembles that seen at the ATTO site, supporting the conclusion that Quiet New Particle Formation is a regionally consistent process across the Central Amazon.**
